# Supplementary material for: Improved SERS sensing on biosynthetically grown self-cleaning plasmonic ZnO nano-leaves
Source: Royal Society of Chemistry journal article supplement (doi:10.1039/d1nj02883a), 2021-01-01

## Electronic Supplementary Information

### Improved SERS sensing on biosynthetically grown self-cleaning plasmonic ZnO nanoleaves

Subhavna Juneja<sup>a</sup>, Jaspal Singh<sup>b</sup>, Roshni Thapa<sup>a</sup>, R. K. Soni<sup>b</sup>, Jaydeep Bhattacharya<sup>a\*</sup>

<sup>a</sup> NanoBiotechnology Lab, School of Biotechnology, Jawaharlal Nehru University, New Delhi 110067

<sup>b</sup> Laser Spectroscopy Lab, Department of Physics, Indian Institute of Technology, New Delhi 110016

Fig 1. Particle size distribution for Au and ZnO nanoparticle

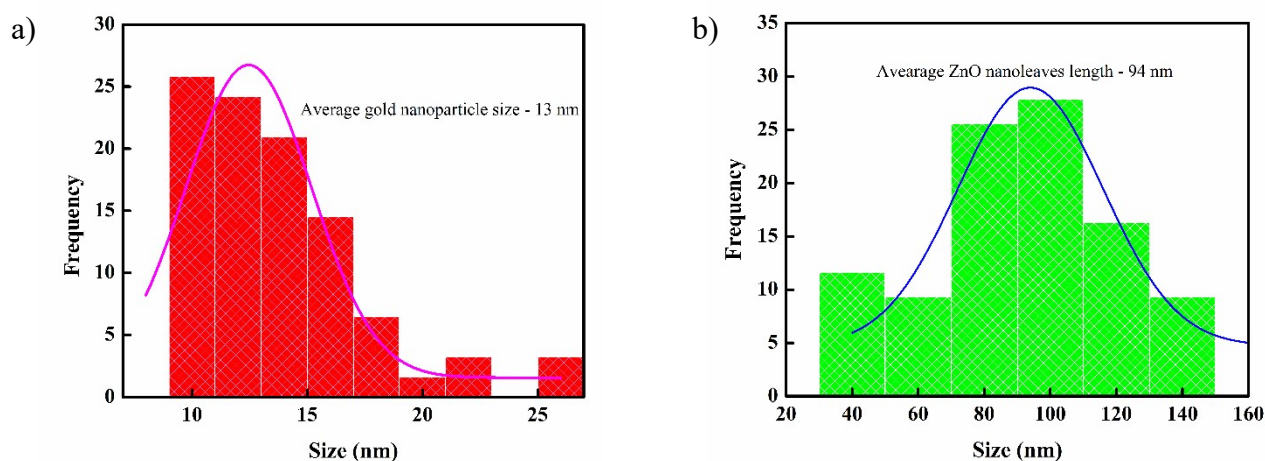

Fig. 2 Digital Images of plating assay of *S.aureus* against ZA performed in dark.

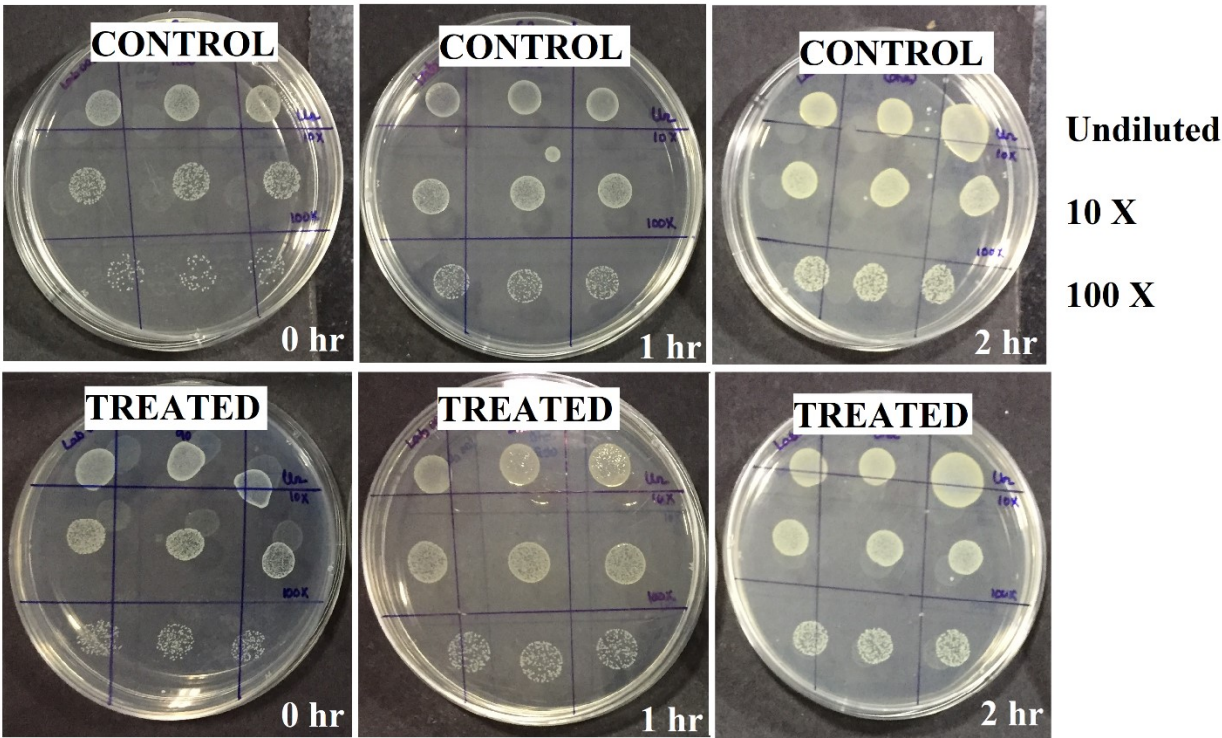

Supplement: d1nj02883a1.pdf [file d1nj02883a1.pdf]
